# Supplementary material for: Evaluation of HDL-modulating interventions for cardiovascular risk reduction using a systems pharmacology approach
Source: PubMed Central journal article supplement (PMC4689335; doi:10.1194/jlr.m057943), 2016-01
Supplement: 10.1194_M057943_jlr.M057943-1.pdf [file 10.1194_M057943_jlr.M057943-1.pdf]

**Supplementary material:** Evaluation of HDL modulating interventions for cardiovascular risk reduction using a systems pharmacology approach

**Table 1: model species**

| Description                             | Notation    | Initial concentration | Unit    |
|-----------------------------------------|-------------|-----------------------|---------|
| Lipid-poor ApoA-I (pre- $\beta_1$ )     | $A_{lp}$    | 6.359                 | mg/dl   |
| ApoA-I on $\alpha$ -HDL                 | $A_\alpha$  | 135.018               | mg/dl   |
| Cholesteryl ester in $\alpha$ -HDL      | $CE_\alpha$ | 35.095                | mg/dl   |
| Particle concentration of $\alpha$ -HDL | $N_\alpha$  | 0.00147               | mmol/dl |
| Cholesteryl ester in LDL                | $CE_{LDL}$  | 81.933                | mg/dl   |
| Cholesteryl ester in VLDL               | $CE_{VLDL}$ | 5.987                 | mg/dl   |

**Table 2: model parameters**

| Description                                                                   | Notation         | Value   | Unit          |
|-------------------------------------------------------------------------------|------------------|---------|---------------|
| Molecular weight of ApoA-I                                                    | $m_A$            | 28500   | g/mol         |
| Molecular weight of cholesterol                                               | $m_C$            | 386     | g/mol         |
| Synthesis rate of ApoA-I                                                      | $r_{in}^{lp}$    | 28.459  | mg/dl/day     |
| Rate of kidney elimination                                                    | $k_{kidney}$     | 2.418   | 1/day         |
| Dissociation rate of excess ApoA-I                                            | $k_{dissoc}$     | 170.45  | 1/day         |
| Rate constant in the lipidation of lipid-poor ApoA-I via ABCA1                | $k_{ABCA1}$      | 95.179  | 1/day         |
| Stoichiometry of FC to ApoA-I in nascent discs                                | $\gamma$         | 10.17   | dimensionless |
| Rate constant of CE transfer: HDL to VLDL                                     | $k_{HV}^{CETP}$  | 1.493   | 1/day         |
| Rate constant of CE transfer: HDL to LDL                                      | $k_{HL}^{CETP}$  | 6.924   | 1/day         |
| Rate constant of CE transfer: LDL to HDL                                      | $k_{LH}^{CETP}$  | 2.885   | 1/day         |
| Rate constant of CE transfer: VLDL to LDL                                     | $k_{VL}$         | 7.703   | 1/day         |
| Synthesis rate of CE to VLDL                                                  | $r_{in}^{VLDL}$  | 1.504   | mg/dl/day     |
| Rate constant of CE elimination from VLDL                                     | $k_{out}^{VLDL}$ | 1.298   | 1/day         |
| Rate constant of CE elimination from LDL                                      | $k_{out}^{LDL}$  | 0.644   | 1/day         |
| Rate constant of SRB1-mediated CE elimination from HDL                        | $k_{SRB1}^{HDL}$ | 0.596   | 1/day         |
| Constant contribution to the rate of $\alpha$ -HDL holo-particle uptake       | $k_{holo}^c$     | 0.134   | 1/day         |
| Size-dependent contribution to the rate of $\alpha$ -HDL holo-particle uptake | $k_{holo}^l$     | -0.0159 | 1/nm/day      |
| Parameter governing the particle concentration dependence of fusion rate      | $k_f$            | 50000   | 1/(mmol/dl)   |

**Table 3: summary of fluxes**

| Description                                                                                              | Expression                                                                                                                                   | Rate    | Unit        |
|----------------------------------------------------------------------------------------------------------|----------------------------------------------------------------------------------------------------------------------------------------------|---------|-------------|
| Flux 1: ApoA-I synthesis                                                                                 | $r_{in}^{lp}$                                                                                                                                | 28.459  | mg/dl/day   |
| Flux 2: CE flux into plasma initiated by interaction of lipid-poor ApoA-I with ABCA1: the model RCT rate | $\gamma \times m_C/m_A \times k_{ABCA1}A_{lp}$                                                                                               | 83.367  | mg/dl/day   |
| Flux 3: ApoA-I flux from lipid-poor ApoA-I to $\alpha$ -HDL                                              | $k_{ABCA1}A_{lp}$                                                                                                                            | 605.243 | mg/dl/day   |
| Flux 4: Regeneration of lipid-poor ApoA-I via HDL remodeling                                             | $k_{dissoc}m_A N_\alpha \left( \frac{A_\alpha}{m_A \times N_\alpha} - n_{ApoA-I}^{Shen} (CE_\alpha / (m_C \times N_\alpha)) \right)^\dagger$ | 592.16  | mg/dl/day   |
| Flux 5: Kidney removal of lipid-poor ApoA-I                                                              | $k_{kidney}A_{lp}$                                                                                                                           | 15.377  | mg/dl/day   |
| Flux 6: Fusion of nascent spherical particles with mature $\alpha$ -HDL                                  | $\frac{k_{ABCA1}A_{lp}}{2 m_A} \frac{k_f N_\alpha}{1 + k_f N_\alpha}$                                                                        | 0.0105  | mmol/dl/day |
| Rate 7: HDL particle holo-uptake rate constant                                                           | $k_{holo}(d) = \frac{k_{holo}^c}{k_{holo}^c + (d - 7.0nm) \times k_{holo}^l}$                                                                | 0.0969  | 1/day       |
| Flux 8: SR-B1 mediated removal of CE from $\alpha$ -HDL                                                  | $k_{SRB1}^{HDL} CE_\alpha$                                                                                                                   | 20.903  | mg/dl/day   |
| Flux 9: Synthesis of CE in VLDL                                                                          | $r_{in}^{VLDL}$                                                                                                                              | 1.504   | mg/dl/day   |
| Flux 10: Elimination of CE from VLDL                                                                     | $k_{out}^{VLDL} CE_{VLDL}$                                                                                                                   | 7.770   | mg/dl/day   |
| Flux 11: Elimination CE from LDL                                                                         | $k_{out}^{LDL} CE_{LDL}$                                                                                                                     | 52.773  | mg/dl/day   |
| Flux 12: Conversion and movement of VLDL-CE to LDL-CE via both lipolysis and CETP                        | $k_{VL} CE_{VLDL}$                                                                                                                           | 46.122  | mg/dl/day   |
| Flux 13: CETP mediated CE transfer from HDL to VLDL                                                      | $k_{HV}^{CETP} CE_\alpha$                                                                                                                    | 52.388  | mg/dl/day   |
| Flux 14: CETP mediated CE transfer from HDL to LDL                                                       | $k_{HL}^{CETP} CE_\alpha$                                                                                                                    | 242.988 | mg/dl/day   |
| Flux 15: CETP mediated CE transfer from LDL to HDL                                                       | $k_{LH}^{CETP} CE_{LDL}$                                                                                                                     | 236.337 | mg/dl/day   |

†The functional dependence of the number of ApoA-I per particle according to the Shen's relation,  $n_{ApoA-I}^{Shen}(x)$ , is given in equations (10-13) of the reference Lu *et al* (2014).

## Text 1: Equation system

$$\frac{dA_{lp}}{dt} = (\text{Flux 1}) - (\text{Flux 3}) - (\text{Flux 5}) + (\text{Flux 4})$$

$$\frac{dA_\alpha}{dt} = (\text{Flux 3}) - (\text{Flux 4}) - (\text{Rate 7} \times A_\alpha)$$

$$\frac{dN_\alpha}{dt} = \frac{k_{ABCA1}A_{lp}}{2 m_A} - (\text{Flux 6}) - (\text{Rate 7} \times N_\alpha)$$

$$\frac{dCE_\alpha}{dt} = (\text{Flux 2}) + (\text{Flux 15}) - (\text{Flux 13}) - (\text{Flux 14}) - (\text{Flux 8}) - (\text{Rate 7} \times CE_\alpha)$$

$$\frac{dCE_{LDL}}{dt} = (\text{Flux 12}) + (\text{Flux 14}) - (\text{Flux 15}) - (\text{Flux 11})$$

$$\frac{dCE_{VLDL}}{dt} = (\text{Flux 9}) + (\text{Flux 13}) - (\text{Flux 12}) - (\text{Flux 10})$$

## Text 2: Intervention representation

1. Up-regulation of ApoA-I synthesis: increase  $r_{in}^{lp}$
2. Infusion of rHDL: a bolus input to  $A_{lp}$
3. Infusion of delipidated HDL: described below
4. Up-regulation of ABCA1: increase  $k_{ABCA1}$

**Table 4: LMK model calibration and validation data**

| Model Calibration                                                                                                                                                                                  | Model Validation                                                                                                                                                       |
|----------------------------------------------------------------------------------------------------------------------------------------------------------------------------------------------------|------------------------------------------------------------------------------------------------------------------------------------------------------------------------|
| Clinical data (HDL-C, ApoA-I, LDL-C, VLDL-C) for hetero- and homozygotes of CETP deficiency <ul style="list-style-type: none"> <li>• Figure 2, Tables 6 &amp; 7: Lu <i>et al</i> (2014)</li> </ul> | Clinical data (HDL-C and ApoA-I) for hetero- and homozygotes of ABCA1 deficiency <ul style="list-style-type: none"> <li>• Figure 5: Lu <i>et al</i> (2014)</li> </ul>  |
| Dependence of ApoA-I clearance on HDL particle size <ul style="list-style-type: none"> <li>• Figure 4: Lu <i>et al</i> (2014)</li> </ul>                                                           | Clinical data (HDL-C and ApoA-I) for hetero- and homozygotes of ApoA-I deficiency <ul style="list-style-type: none"> <li>• Figure 5: Lu <i>et al</i> (2014)</li> </ul> |
| Relationship between HDL particle size and the number of ApoA-I molecules per particle (Shen's relation) <ul style="list-style-type: none"> <li>• Mazer <i>et al</i> (2013)</li> </ul>             | Biphasic behaviour in the ApoA-I tracer kinetics study <ul style="list-style-type: none"> <li>• Figure 6: Lu <i>et al</i> (2014)</li> </ul>                            |
| CE fluxes between HDL and ApoB containing particles <ul style="list-style-type: none"> <li>• Figure 3 and Table 8: Lu <i>et al</i> (2014)</li> </ul>                                               |                                                                                                                                                                        |

## Supplementary figures:

Figure 1: Simulated profiles of lipid parameters for RVX-208 @ 150 mg dose

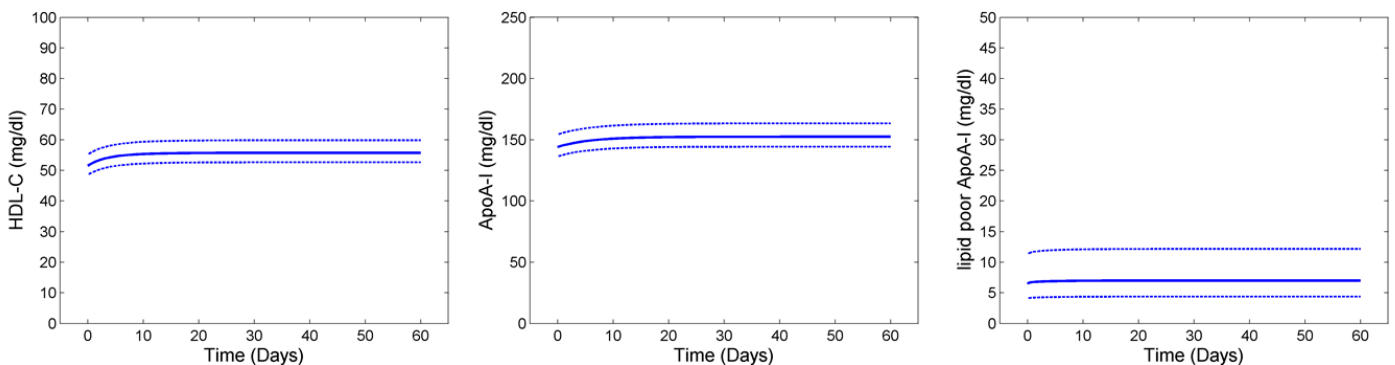

Figure 2: Simulated profiles of lipid parameters for CSL-111

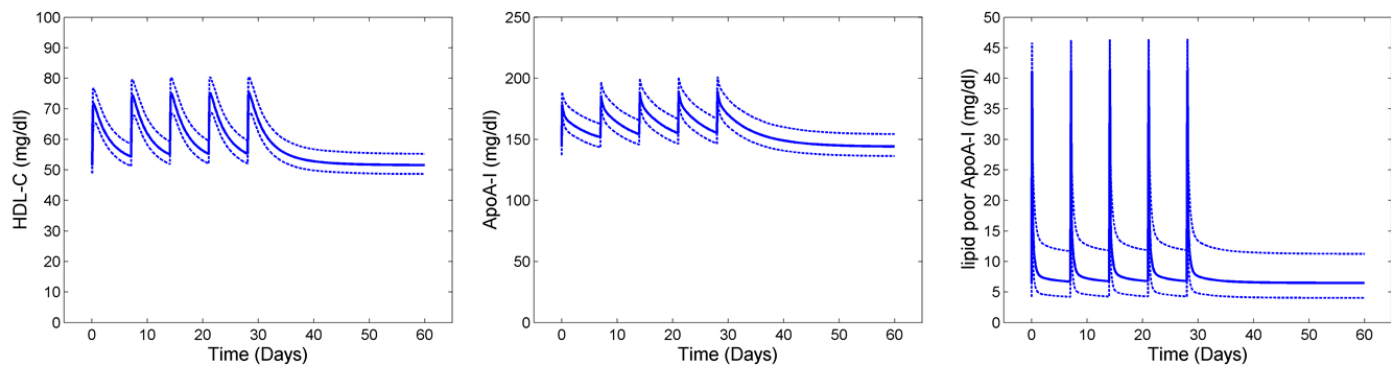

### Implementation of delipidation protocol

The details of the delipidation protocol are described in (Waksman, Torguson et al. 2010); in this work the delipidation protocol is represented in 3 key steps:

- (1) Plasma collection: in this step 1 liter of plasma is collected; this step takes 1.5 hours. In this step all lipid quantities in 1 liter of plasma are removed
- (2) Delipidation: in this step the cholesterol from the HDL particles is removed with efficiency is ~80%. In this work this is represented as a removal of the cholesterol in 80% of the  $\alpha$ -HDL particles. This removes all the cholesterol from the particles and apoA-I mass transfers from  $A_\alpha$  to  $A_{lp}$ ; the apoA-I (total) remained unchanged.
- (3) Infusion: in this step the delipidated plasma is infused into the patient; this step takes 2 hours.

The changes in the total lipid quantities following each of the three steps in shown in the table below:

|                   | initial steady state conc. (mg/dl) | initial steady state amount (mg)* | amount (mg) removed in plasma collection (step 1)* | amount (mg) remaining in patient after plasma collection (step 1) | amount (mg) after delipidation of collected plasma (step 2) | amount (mg) in patient after reinfusion (steps 3) | post delipidation conc. (mg/dl) |
|-------------------|------------------------------------|-----------------------------------|----------------------------------------------------|-------------------------------------------------------------------|-------------------------------------------------------------|---------------------------------------------------|---------------------------------|
| HDL-C             | 52.63                              | 263.15                            | 86.84                                              | 176.31                                                            | 17.37                                                       | 193.68                                            | 38.74                           |
| lipid poor ApoA-I | 6.36                               | 31.80                             | 10.49                                              | 21.31                                                             | 188.56                                                      | 209.87                                            | 41.97                           |
| ApoA-I on aHDL    | 134.90                             | 674.50                            | 222.59                                             | 451.92                                                            | 44.52                                                       | 496.43                                            | 99.29                           |
| ApoA-I (total)    | 141.26                             | 706.30                            | 233.08                                             | 473.22                                                            | 233.08                                                      | 706.30                                            | 141.26                          |

\*typical volume of 5 liters of blood and 3 liter of plasma used

The dynamics of the patient's lipid profiles during this process are not included in the model; instead the changes in the concentrations before and after the complete process are implemented. The patient's responses to the changes in the lipid parameters with each delipidation process for longer more relevant time scales in shown in Figure 4 of the manuscript.

### **References**

- Lu, J., K. Hubner, et al. (2014). "An in-silico model of lipoprotein metabolism and kinetics for the evaluation of targets and biomarkers in the reverse cholesterol transport pathway." *PLoS Comput Biol* **10**(3): e1003509.
- Mazer NA, Giulianini F, et al. (2013). "A comparison of the theoretical relationship between HDL size and the ratio of HDL cholesterol to apolipoprotein A-I with experimental results from the Women's Health Study." *Clin Chem* **59**: 949–958.

Waksman, R., R. Torguson, K. M. Kent, A. D. Pichard, W. O. Suddath, L. F. Satler, B. D. Martin, T. J. Perlman, J. A. Maltais, N. J. Weissman, P. J. Fitzgerald and H. B. Brewer, Jr. (2010). "A first-in-man, randomized, placebo-controlled study to evaluate the safety and feasibility of autologous delipidated high-density lipoprotein plasma infusions in patients with acute coronary syndrome." J Am Coll Cardiol **55**(24): 2727-2735.
